# Supplementary material for: Simultaneous disintegration of outlet glaciers in Porpoise Bay (Wilkes Land), East Antarctica, and the long-term speed-up of Holmes Glacier
Source: Copernicus journal article supplement (doi:10.5194/tc-2016-151), 2016-06-14
Supplement: Supplementary file [file tc-2016-151-RC2-supplement.pdf]

28

29

30

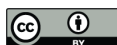

## 31 1. Introduction

32 Iceberg calving is an important process that accounts for around 50% of total mass loss to the  
 33 ocean in Antarctica (Depoorter et al., 2013; Rignot et al., 2013). Moreover, dynamic  
 34 feedbacks associated with retreat and/or thinning of buttressing ice shelves or floating glacier  
 35 tongues can result in an increased discharge of ice into the ocean (De Angelis and Skvarca,  
 36 2003; Rignot et al., 2004; Wuite et al., 2015). At present, calving dynamics are only partially  
 37 understood (Benn et al., 2007; Chapuis and Tetzlaff, 2014) and models struggle to replicate  
 38 observed calving rates (van der Veen, 2002; Astrom et al., 2014). Therefore, improving our  
 39 understanding of the mechanisms driving glacier calving and how glacier calving cycles have  
 40 responded to recent changes in the ocean-climate system is important in the context of future  
 41 ice sheet mass balance and sea level.

42 Calving is a two-stage process that requires both the initial ice fracture and the subsequent  
 43 transport of the detached iceberg away from the calving front (Quincey and Jacobs, 2013). In  
 44 Antarctica, major calving events can be broadly classified into two categories: the discrete  
 45 detachment of large tabular icebergs (e.g. Mertz glacier tongue: Massom et al., 2015) or the  
 46 spatially extensive disintegration of floating glacier tongues or ice shelves into numerous  
 47 smaller icebergs (e.g. Larsen A & B ice shelves (Rott et al., 1996; Scambos et al., 2009).  
 48 Observations of decadal-scale changes in glacier terminus position in both the Antarctic  
 49 Peninsula and East Antarctica have suggested that despite some degree of stochasticity,  
 50 iceberg calving and glacier advance/retreat is likely driven by external climatic forcing (Cook  
 51 et al., 2005; Miles et al., 2013). However, despite some well-documented ice shelf collapses  
 52 (Scambos et al., 2003; Banwell et al., 2013) and major individual calving events (Masson et  
 53 al., 2015) there is a paucity of data on the nature and timing of calving from glaciers in  
 54 Antarctica (e.g. compared to Greenland: Moon and Joughin, 2008; Carr et al., 2013), and  
 55 particularly in East Antarctica.

56 Following recent work that highlighted the potential vulnerability of the East Antarctic Ice  
 57 Sheet in Wilkes Land to ocean-climate forcing and marine ice sheet instability (Greenbaum et  
 58 al., 2015; Aitken et al., 2016; Miles et al., 2016), we analyse the recent calving activity of six  
 59 outlet glaciers in the Porpoise Bay region using monthly satellite imagery between November  
 60 2002 and March 2012. We then turn our attention to investigating the drivers behind the  
 61 observed calving dynamics, before examining evidence for any longer term changes in

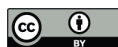

62 calving using sea ice concentrations and satellite imagery from 1963, 1973, 1991, 1997, 2002  
 63 and 2016.

## 64 **2. Study area**

65 Porpoise Bay ( $-76^{\circ}\text{S}$ ,  $128^{\circ}\text{E}$ ) is situated in Wilkes Land, East Antarctica, approximately 300  
 66 km east of Moscow University Ice Shelf and 550 km east of Totten glacier (Fig. 1). This area  
 67 was selected because it occupies a central position in Wilkes Land, which is thought to have  
 68 experienced mass loss over the past decade (King et al., 2012; Sasgen et al., 2013; McMillan  
 69 et al., 2014), and which is the only region of East Antarctica where the majority of marine-  
 70 terminating outlet glaciers are undergoing retreat (Miles et al., 2016). This is particularly  
 71 concerning because Wilkes Land overlies the Aurora subglacial basin and, due its reverse bed  
 72 slope and deep troughs (Young et al., 2011), it may have been susceptible to unstable  
 73 grounding line retreat in the past (Cook et al., 2014), and could make significant  
 74 contributions to global sea level in the future (DeConto and Pollard, 2016). However, despite  
 75 some analysis on glacier terminus position on a decadal timescales (Frezzotti and Polizzi,  
 76 2002; Miles et al., 2013; 2016), there has yet to be any studies focusing on inter-annual and  
 77 sub-annual changes in terminus position and calving activity in the region.

78 Porpoise Bay is 150 km wide and is typically filled with land-fast multi-year sea-ice (Fraser  
 79 et al., 2012). In total, six glaciers were analysed, with glacier velocities (from Rignot et al.,  
 80 2011b) ranging from  $\sim 440 \text{ m yr}^{-1}$  (Sandford Glacier) to  $\sim 2000 \text{ m yr}^{-1}$  (Frost Glacier) (Table  
 81 1). Recent studies have suggested that the largest (by width) glacier feeding into the bay -  
 82 Holmes Glacier (both the eastern and western branches) - has been thinning over the past  
 83 decade (Pritchard et al., 2009; McMillan et al., 2014).

## 84 **3. Methods**

### 85 **3.1 Satellite imagery and terminus position change**

86 Glacier terminus positions were mapped at approximately monthly intervals between  
 87 November 2002 and March 2012, using Envisat Advanced Synthetic Aperture Radar (ASAR)  
 88 Wide Swath Mode (WSM) imagery across six glaciers, which were identified from the  
 89 Rignot et al. (2011b) ice velocity dataset (Fig.1b). Additional sub-monthly imagery between  
 90 December 2006 and April 2007 were used to gain a higher temporal resolution following the  
 91 identification of a major calving event around that time. Glacier terminus positions were also  
 92 mapped on satellite imagery from 1963, 1973, 1990, 1997, 2002, and 2016 (Table 2).

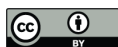

93 Approximately 65% of all glacier frontal measurements were made using an automated  
 94 mapping method that classified glacier tongues and sea-ice into polygons based on their raw  
 95 pixel value, with the boundary between the two taken as the terminus position. In images  
 96 where automated classification was unsuccessful, terminus position was delineated manually.  
 97 The majority of manual measurements were undertaken in the austral summer (December –  
 98 February) when automated classification was problematic due to the high variability in  
 99 backscatter on glacier tongues as a result of surface melt. Following the mapping of the  
 100 glacier termini, length changes were calculated using the box method (Moon and Joughin,  
 101 2008). This method calculates the glacier area change between each time step divided by the  
 102 width of the glacier, to give an estimation of glacier length change. The width of glacier was  
 103 obtained by a reference box which approximately delineates the sides of the glacier.

104 Given the nature of the heavily fractured glacier fronts and the moderate resolution of Envisat  
 105 ASAR WSM imagery (80 m) it was sometimes difficult to establish if individual or blocks of  
 106 icebergs were attached to the glacier tongue. As a result, there are relatively large errors in  
 107 precisely determining terminus change on a monthly time-scale ( $\sim \pm 500$  m). However,  
 108 because our focus is on major calving events, absolute terminus position is less important  
 109 than the identification of major episodes of calving activity. Indeed, because estimations of  
 110 terminus position were made at approximately monthly intervals, calving events were easily  
 111 distinguished because the following month's estimation of terminus position would clearly  
 112 show the glacier terminus in a retreated position. In addition, each image was also checked  
 113 visually to make sure no small calving events were missed (i.e. as indicated by the presence  
 114 of icebergs proximal to the glacier tongue).

### 115 **3.2 Sea-ice**

116 The long term record of sea-ice concentrations in Porpoise Bay were calculated using mean  
 117 monthly Bootstrap sea-ice concentrations derived from the Nimbus-7 satellite and the  
 118 Defence Meteorological Satellite Program (DMSP) satellites which offers near complete  
 119 coverage between October 1978 and December 2014 (Comiso, 2014;  
 120 <http://nsidc.org/data/nsidc-0079>). To extend the sea-ice record, we also use mean monthly  
 121 Nimbus-5 Electrically Scanning Microwave Radiometer (ESMR) derived sea-ice  
 122 concentrations (Parkinson et al., 2004; [https://nsidc.org/data/docs/daac/nsidc0009\\_esmr](https://nsidc.org/data/docs/daac/nsidc0009_esmr_seaice.gd.html)  
 123 [\\_seaice.gd.html](https://nsidc.org/data/docs/daac/nsidc0009_esmr_seaice.gd.html)), which offer coverage between December 1972 and March 1977. However,



124 from March to May 1973, August 1973, April 1974 and June to August 1975, mean monthly  
125 sea-ice concentrations were not available.

126 Sea-ice concentrations were extracted from 18 grid cells that extended across Porpoise Bay,  
127 but not into the open water that extended beyond the limits of the bay (Fig. 1b). Grid cells  
128 which were considered likely to be filled with glacial ice were excluded. Both datasets have a  
129 spatial resolution of 25 km and monthly sea-ice concentration anomalies were calculated  
130 from the 1972-2014 monthly mean.

131 Daily sea-ice concentrations derived from the ASI algorithm from Advanced Microwave  
132 Scanning Radiometer- EOS (AMSR-E) data (Spreen et al., 2008) were used to calculate daily  
133 sea-ice concentration anomalies during the January 2007 sea-ice break-up  
134 (<http://icdc.zmaw.de/1/daten/cryosphere/seaiceconcentration-asi-amsre.html>). This dataset  
135 was used because it provides a higher spatial resolution (6.25 km) compared to those  
136 available using Bootstrap derived concentrations (25 km). This is important because it  
137 provides a more accurate representation of when sea-ice break-up was initiated and, due to its  
138 much higher spatial resolution, it provides data from much closer to the glacier termini.

### 139 3.3 RACMO

140 We used the Regional Atmospheric Climate Model (RACMO) V2.3 (van Wessem et al., 2014)  
141 to simulate daily surface melt fluxes in the study area between 1979 and 2015 at a 27 km  
142 spatial resolution. The melt values were extracted from floating glacier tongues in Porpoise  
143 Bay because the model masks out sea-ice. The actual surface melt values are likely to be  
144 different on glacial ice, compared to the sea-ice, but the relative magnitude of melt is likely to  
145 be similar temporally.

## 146 4. Results

### 147 4.1 Terminus position change

148 Analysis of glacier terminus position change of six glaciers in Porpoise Bay between  
149 November 2002 and March 2012 reveals three broad patterns of glacier change (Fig. 2). The  
150 first pattern is shown by Holmes (West) glacier, which advances a total of ~13 km throughout  
151 the observation period, with no evidence of any major iceberg calving that resulted in  
152 substantial retreat of the terminus beyond the measurement error (+/- 500 m). The second is  
153 shown by Sandford Glacier tongue, which advanced ~1.5 km into the ocean between



154 November 2002 and April 2006, before its floating tongue broke away in May 2006. A further  
 155 smaller calving event was observed in January 2009 and, by the end of the study period, its  
 156 terminus had retreated around 1 km from its position at the start of the measurement period in  
 157 2002. The third pattern is shown by Frost Glacier, Glacier 1, Glacier 2 and Holmes (East)  
 158 glaciers, which all advanced between November 2002 and January 2007, albeit with a small  
 159 calving event in Frost glacier in May 2006. However, between January and April 2007, Frost  
 160 Glacier, Glacier 1, Glacier 2 and Holmes (East) glaciers all underwent a large simultaneous  
 161 calving event. This lead to 1,300 km<sup>2</sup> of ice being removed from glaciers in Porpoise Bay,  
 162 although we also note the disintegration of a major tongue from an unnamed glacier further  
 163 west (see velocity data in Fig. 1b), which contributed a further 1,600 km<sup>2</sup>. Thus, in a little over  
 164 three months a total of 2,900 km<sup>2</sup> of ice was removed from glacier tongues in the study area  
 165 (Fig. 3). Following this calving event, the fronts of these glaciers stabilised and began  
 166 advancing at a steady rate until the end of the study period (March, 2012) (Fig. 2), with the  
 167 exception of Frost glacier which underwent a small calving event in April 2010.

#### 168 **4.2 Evolution of the 2007 calving event**

169 A series of eight sub-monthly images between December 11<sup>th</sup> 2006 and April 8<sup>th</sup> 2007 show  
 170 the evolution of the 2007 calving event (Fig. 4). Between December 11<sup>th</sup> 2006 and January 2<sup>nd</sup>  
 171 2007, the land-fast sea-ice edge retreats past Sandford glacier to the edge of Frost glacier and  
 172 there is some evidence of sea-ice fracturing in front of the terminus of Glacier 2 (Fig. 4b).  
 173 From January 2<sup>nd</sup> to January 9<sup>th</sup> a small section (~40 km<sup>2</sup>) of calved ice broke away from Frost  
 174 glacier, approximately in line with the retreat edge of land-fast sea-ice (Fig. 4c). By January  
 175 25<sup>th</sup>, significant fracturing in the land-fast sea-ice had developed, and detached icebergs from  
 176 Frost, Glacier 1, Glacier 2 and Holmes (East) glaciers begin to breakaway (Fig. 4d). This  
 177 process of rapid sea-ice breakup in the east section of the bay and the disintegration of sections  
 178 of Frost glacier, Glacier 1, Glacier 2 and Holmes East glaciers continues up to March 10<sup>th</sup> 2007  
 179 (Fig. 4g). In contrast, the west section of Porpoise Bay remains covered in sea-ice in front of  
 180 Holmes west glacier, which does not calve throughout this event. By April 8<sup>th</sup>, the calving  
 181 event had ended with a large number of calved icebergs now occupying the bay (Fig. 4h).

#### 182 **4.3 Link between sea-ice and calving in Porpoise Bay**

183 Analysis of mean monthly sea-ice concentration anomalies in Porpoise Bay between  
 184 November 2002 and March 2012 (Fig. 5) reveals a major negative sea-ice anomaly occurred  
 185 between January and June 2007, where monthly sea-ice concentrations were between 35% and

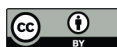

186 40% below average. This is the only noticeable (>20%) negative ice anomaly in Porpoise Bay  
187 and it coincides with the major calving event described in the previous section (see Fig. 4), and  
188 strongly suggesting that the two processes are linked. The series of satellite images showing  
189 the evolution of the January to April 2007 calving event clearly shows glacier calving taking  
190 place after initial sea-ice breakup e.g. Fig. 4b-e. Furthermore, the smaller calving events of  
191 Sandford and Frost glaciers all take place after sea-ice had retreated away from the glacier  
192 terminus (Fig. 6). Indeed, throughout the study period, there is no evidence of any calving  
193 events taking place with sea-ice proximal to glacier termini. This suggests that glaciers in  
194 Porpoise Bay are very unlikely to calve with sea-ice present at their termini.

#### 195 **4.4 Longer-term glacier calving cycles**

196 We now turn our attention to reconstructing calving activity and glacier frontal position change  
197 over a longer time-period, with a particular focus on the largest glacier – Holmes (West). Our  
198 terminus position change results indicate that glaciers in Porpoise Bay will only calve when  
199 sea-ice breaks away from glacier termini. Analysis of long-term sea-ice concentrations in  
200 Porpoise Bay from 1972 to 2014 suggests that there have been larger sea-ice break-up events  
201 prior to January 2007 (Fig. 7). The two largest break-up events occurred in April 1986 and  
202 February 2002, when monthly sea-ice concentrations suggest a near-complete removal of all  
203 sea-ice in the Bay, unlike in January 2007, where sea-ice remained in the west section of the  
204 bay in front of Holmes (West) Glacier (Fig 4). This suggests that the only time Holmes (West)  
205 Glacier's terminus was free of sea-ice during our observational period (from 1972-2014) was  
206 in April 1986 and February 2002. Moreover, although there are several other moderate  
207 negative monthly mean sea-ice anomalies (~20 to 30%) throughout the sea-ice concentration  
208 observational period (Fig. 7), we suggest these cannot have resulted in the Holmes West  
209 Glacier terminus being sea-ice free. For its terminus to be clear of sea-ice, the sea-ice in the  
210 outer regions of Porpoise closest to the open ocean must be removed before the sea-ice  
211 close to its terminus. Therefore, it is only the large sea-ice anomalies which can result in the  
212 Holmes (West) Glacier terminus being sea-ice free i.e. the removal of all sea-ice in the bay.  
213 Thus, it is very likely Holmes (West) Glacier calved in April 1986 and February 2002. Ideally,  
214 we would test this by analysing a series of satellite images (e.g. Fig 4). However, because there  
215 is no cloud-free satellite imagery available around the time of its proposed calving periods  
216 (April 1986 and February 2002), we rely on a comparison between satellite images that are as  
217 close as possible to before and after the major sea-ice break-up events.





218 By analysing available satellite imagery from October 1997 and August 2002 (see Fig. 8), it is  
 219 clear that there has been a large calving event at Holmes (West) Glacier at some point between  
 220 these dates. This is because the August 2002 position is around 15 km behind the October 1997  
 221 position (Fig. 8b). As noted above, our observations of sea-ice concentrations (Fig. 7) suggest  
 222 that the most likely time would be in February 2002, which is the only major negative sea-ice  
 223 anomaly that might have been large enough to te an absence of sea-ice in front of the  
 224 glacier's terminus. This is further supported by observations of Holmes (West) Glacier calving  
 225 front in August 2002 (i.e. little crevassing) (Fig. 8b), which is entirely consistent with a calving  
 226 event having taken place a few months beforehand.

227 The nearest available satellite imagery either side of the April 1986 sea-ice break-up event is in  
 228 January 1973 and February 1991 (Fig. 9) and, again, it is clear from the position of the glacier  
 229 terminus in February 1991 that there has been a calving activity at some point between these  
 230 dates, which we suggest occurred in April 1986 based on the major negative sea-ice  
 231 concentration data. Indeed, the terminus position of Holmes (West) Glacier in February 1991 is  
 232 entirely consistent with a calving event in April 1986, assuming that it calves to a similar  
 233 position following each calving event e.g. perhaps losing the unconstrained section of its  
 234 glacier tongue. That is, if the glacier calved in April 1986, as we suggest, we would expect it to  
 235 have advanced by the time of the next available image in February 1991 (Fig. 9b). Therefore,  
 236 we suggest that these observations are entirely consistent with two major calving events at  
 237 Holmes (West) Glacier in April 1986 and February 2002. We now turn our attention to  
 238 extending this record by analysing imagery from 1963 and 1973.

239 The 1963 ARGON satellite image shows Holmes (West) Glacier terminus (and indeed most of  
 240 the glacier termini) very close to the August 2002 position, which we suggest is just a few  
 241 months after a major calving event in February 2002. Thus, the 1963 image might suggest that  
 242 Holmes (West) Glacier (and other glaciers) had recently calved prior to 1963 (Fig. 10a). By  
 243 January 1973, however, Holmes (West) Glacier had advanced around 9 km from its 1963  
 244 position (Fig. 10b). Given Holmes (West) Glacier's present-day velocity of  $\sim 1,400 \text{ m yr}^{-1}$   
 245 (Rignot et al., 2011b), an advance of around 14 km would be expected in the ten year period  
 246 between 1963 and 1973. This means that Holmes (West) Glacier either advanced at a slower  
 247 rate in the 1960s ( $\sim 900 \text{ m yr}^{-1}$ ) or that the glacier calved between 1963 and 1973. Analysis of  
 248 the 1963 and 1973 images suggests that calving activity is unlikely. This is because individual  
 249 icebergs can be tracked from the front of Holmes (West) Glacier in 1963 to the edge of the  
 250 multi-year sea ice pack in 1973 (Fig.  This confirms that there has been no sea-ice break-up





251 events and, as such, no major calving events between 1963 and 1973. Furthermore, Sandford  
252 Glacier tongue can be seen to advance several kilometres between October 1963 (Fig. 10a) and  
253 November 1973 (Fig. 10b). If there had been a sea-ice break-up, this ice tongue would likely  
254 calved and been transported away from the terminus. Moreover, in all available satellite  
255 imagery after 1973, the largest glacier tongue observed at Sandford glacier is only ~2 km. As  
256 Sandford Glacier is the closest glacier to the open ocean in Porpoise Bay, its terminus can be  
257 sea-ice free even during relatively small sea-ice break-up events. Therefore, in order to  
258 facilitate the growth of a ~10 km glacier tongue between 1963 and 1973 (Fig. 10), it suggests  
259 that there must have been high sea-ice concentrations in Porpoise Bay during this period, thus  
260 helping to preserve Sandford Glacier tongue. Thus, we suggest that it is highly unlikely that  
261 any glaciers calved in Porpoise Bay between 1963 and 1973 because there were no sea-ice  
262 break-up events. This implies that the velocity of the Holmes West Glacier between 1963 and  
263 1973 was slower ( $\sim 900 \text{ m yr}^{-1}$ ) during that era, and that the glacier velocity has approximately  
264 increased by 50% since that time.

265 Combining the known terminus position with the velocity estimates between 1963 and 1973,  
266 and the calving events in April 1986 and February 2002, allows us to reconstruct the long-term  
267 calving cycle of Holmes (West) Glacier (Fig. 12). In order to do this we make two  
268 assumptions. First, we simply extrapolate velocity linearly in between periods without  
269 observations. Secondly, to determine how far the terminus retreated after the calving event in  
270 1986 and the date of calving before 1963, for which we have no imagery, we simply assume it  
271 retreats close to the position attained after the February 2002 calving event in August 2002.  
272 Our reconstruction suggests that, despite an increase in velocity, Holmes (West) Glacier tends  
273 to calve when its terminus reaches an extended position that is around 20 km from its known  
274 retreat positions in 1986 and 2002. Furthermore, we note that the very recent terminus position  
275 (austral summer 2016) is in a similar position to that which existed immediately prior to the  
276 calving events of April 1986 and February 2002, suggesting that a further major calving event  
277 is imminent.

#### 278 4.5 2016 calving event

279 During the preparation of this manuscript, and consistent with our conclusion from the  
280 previous section, observations between March 19<sup>th</sup> and May 13<sup>th</sup> 2016, revealed that Frost  
281 glacier, Holmes (East) and Holmes (West) glaciers underwent a further disintegration event  
282 following the break-up of sea-ice from their glacier tongues (Fig. 13). This process has so far



283 resulted in the loss of  $\sim 1,500 \text{ km}^2$  of ice from glacier tongues in Porpoise Bay. The calving  
 284 event is likely incomplete and may continue, potentially also influencing Glacier 1 and 2. We  
 285 note that the recent calving of Holmes (West) Glacier is entirely consistent with our earlier  
 286 observations in that: 1) sea-ice must be removed in order for Holmes (West) Glacier and other  
 287 glaciers in Porpoise Bay to calve (Fig.14); 2) Holmes (West) glacier undergoes a major calving  
 288 event after reaching a similar position in each calving cycle (e.g. Fig. 12); 3) Holmes (West)  
 289 glacier retreats to a similar position after each calving event. Furthermore, we can now  
 290 estimate that the previous three calving cycles of Holmes West glacier have been in  $\sim 29$   
 291 ( $\sim 1957$ -1986), 16 (1986-2002) and 14 (2002-2016) year cycles.

## 292 **5. Discussion**

### 293 **5.1 Climatic drivers of the January 2007 calving event**

294 We report a major, synchronous calving event in January 2007 that resulted in  $\sim 2,900 \text{ km}^2$  of  
 295 ice being removed from glacier tongues in the Porpoise Bay region of East Antarctica. This is  
 296 comparable to some of the largest disintegration events ever observed in Antarctica e.g. Larsen  
 297 A, 1995 ( $4,200 \text{ km}^2$ ), Larsen B, 2002 ( $3,250 \text{ km}^2$ ), and is the largest to have been observed in  
 298 East Antarctica. However, this event differs to those observed on the ice shelves of the  
 299 Antarctic Peninsula, in the sense that it is more closely linked to a predictable cycle of glacier  
 300 advance and retreat (e.g. Fig. 12), as opposed to a catastrophic collapse that may be  
 301 unprecedented. That said, it is intriguing that there is evidence of this cycle speeding up over  
 302 the past 50 years, concomitant with an increase in glacier velocity(e.g. Fig. 12)

303 The disintegration event was driven by the break-up of the multi-year land-fast sea-ice which  
 304 usually occupies Porpoise Bay. This link between sea-ice and glacier terminus position has  
 305 been largely confined to studies in Greenland, where sea-ice melange dynamics has been  
 306 linked to inter-annual variations in glacier terminus position (Amundson et al., 2010; Carr et  
 307 al., 2013; Todd and Christoffersen, 2014; Cassotto et al., 2015). However, this is the first time  
 308 sea-ice has been linked to large scale disintegration of glacier tongues in East Antarctica.

309 It is likely that multiple climatic processes operating over different timescales contributed to  
 310 the January 2007 sea-ice break-up event. This is because the majority of sea-ice in Porpoise  
 311 Bay is multi-year sea-ice (Fraser et al., 2012). Although there are no long-term observations of  
 312 multi-year sea-ice thickness in Porpoise Bay, observations and models of the annual cycle of  
 313 multi-year sea-ice in other regions of East Antarctica suggests that multi-year sea-ice thickens  
 314 seasonally and thins each year (Lei et al., 2010; Sugimoto et al., 2016; Yang et al., 2016).



315 Therefore, the relative strength, stability and thickness of multi-year sea ice at a given time  
316 period is driven not only by climatic conditions in the short term (days/weeks), but also by  
317 climatic conditions in the preceding years.

318 As the sea-ice break-up occurred during the peak of austral summer in January 2007, it is  
319 plausible that air temperature played an important role in initiating the sea-ice break-up.  
320 Analysis of RACMO2.3 mean monthly melt values in Porpoise Bay show that although  
321 January 2007 was above the average, it was not exceptional, lying within one standard  
322 deviation of the long term mean (1979-2015). However, analysing daily melt values  
323 throughout January 2007 suggests that there was an exceptional melt event centred on the 11<sup>th</sup>  
324 January (Fig. 15). This melt is the 11<sup>th</sup> highest day on record (1979-2015) and the 4<sup>th</sup> highest  
325 since 2000. Analysis of daily sea-ice concentrations in Porpoise Bay show an immediate drop  
326 after this melt peak (Fig. 15), suggesting the exceptional melt peak of the 11<sup>th</sup> January may  
327 have been important in initiating sea-ice break-up. As a consequence of a melt peak of this  
328 magnitude, the growth of sea-ice surface ponding would be expected. There is no cloud-free  
329 optical satellite imagery available for January 2007 to confirm this prediction. However,  
330 Landsat imagery from the 21<sup>st</sup> January 2014, which occurs shortly after a melt event of a  
331 similar magnitude, clearly demonstrates that substantial sea-ice melt ponding is possible near  
332 the coast in Porpoise Bay (Fig. 16). Indeed, this is the first time that sea-ice ponding to this  
333 extent has been observed in coastal East Antarctica. In the Arctic, sea-ice melt ponding along  
334 pre-existing weaknesses has been widely reported to precede sea-ice break-up (Ehn et al.,  
335 2011; Petrich et al., 2012; Landy et al., 2014; Schroder et al., 2014; Arntsen et al., 2015).  
336 However, because there have been similar magnitude melt events to that of mid-January 2007  
337 which have not resulted in the break-up of sea-ice in Porpoise Bay, we suggest that whilst it  
338 may have driven the initial sea-ice break-up, it was probably dependent on other preceding  
339 factors.

340 In the austral summer melt season (2005/06) that preceded the break-up event in January 2007,  
341 there was an anomalously high mean melt in December 2005 (Fig. 17). Indeed, December  
342 2005 ranks as the second warmest month on record (1979-2015) in Porpoise Bay. To place this  
343 month into perspective, we note that it would rank above the average melt value of all  
344 Decembers and Januarys since 2000 on the remnants of Larsen B ice shelf. High resolution  
345 optical satellite imagery reveal extensive sea-ice melt ponding and fracturing following this  
346 melt event in January 2006 (Fig. 18), and it is plausible that this exceptionally warm month  
347 may have weakened the multi-year sea-ice in Porpoise Bay and primed it for break-up the



348 following year. Indeed, by the end of the 2005/06 melt season, the sea-ice pack in Porpoise  
 349 Bay had retreated to the edge of Frost Glacier (e.g. Fig 6), suggesting that the sea-ice may have  
 350 come close to complete break-up. Therefore, we hypothesise that the January 2007 sea-ice  
 351 break-up event was driven by a combination of an exceptionally warm 2005/06 austral  
 352 summer, which caused weakening of multi-year sea-ice, but with break-up initiated the  
 353 following melt season after the January 11<sup>th</sup> melt event.

## 354 5.2 Calving cycle and increase in velocity of Holmes West Glacier

355 Our reconstruction of the calving cycle of Holmes (West) Glacier (Fig. 12) indicates that the  
 356 glacier undergoes a major calving event when it reaches roughly the same position in each  
 357 cycle. This suggests that calving is likely to be influenced by the bathymetry and topography  
 358 of Porpoise Bay. However, sea-ice must still be removed in order for Holmes (West) Glacier to  
 359 calve, suggesting a complex interaction between the stability of Holmes (West) Glacier's  
 360 floating tongue, bathymetry, topography and sea-ice. In both Greenland (McFadden et al.,  
 361 2011; Carr et al., 2013; Carr et al., 2015) and Antarctica (Wang et al., 2016), underlying  
 362 bathymetry is thought to be crucial in determining the calving of floating glacier tongues.  
 363 However, our results suggest that the bathymetry and topography of Porpoise Bay may only be  
 364 a secondary control to the calving of Holmes (West) Glacier. This is because sea-ice must be  
 365 removed from its terminus before calving. Indeed, we note that complete removal of sea-ice  
 366 from Porpoise Bay only occurs when Holmes (West) Glacier is at an advanced position. If the  
 367 break-up of sea-ice was solely driven by climate, complete break-ups would be expected under  
 368 strong climatic warming events, irrespective of the position of Holmes (West) Glacier.  
 369 Therefore, we speculate sea-ice break-ups must be at least in part influenced by the position of  
 370 Holmes (West) Glacier tongue itself. That is, as Holmes (West) Glacier advances it slowly  
 371 pushes multi-year sea-ice further out into the open ocean to the point where the multi-year sea-  
 372 ice pack may become unstable. This could be influenced by local bathymetry and ocean  
 373 circulation, but no observations are available. However, we note that once the glacier forces  
 374 the sea-ice into a more unstable region, it still requires a strong climatic warming event to  
 375 initiate the sea-ice break-up (see section 5.1) and subsequent glacier calving.

376 Despite Holmes (West) Glacier consistently calving in approximately the same position, the  
 377 time taken for the glacier to calve in each cycle has decreased, demonstrating an increase in  
 378 glacier velocity. Indeed, our estimates suggest that the present day-velocity of Holmes (West)  
 379 Glacier is approximately 50% faster than its average 1963-1973 velocity. This is significant



380 because, based on the flux gate calculations of Rignot et al. (2013), Holmes (West) Glacier is  
 381 now exporting approximately 8 GT yr<sup>-1</sup> more into the ocean than it was between 1963 and  
 382 1973. This also provides the first evidence of a long term increase in velocity of an outlet  
 383 glacier in East Antarctica. A potential mechanism which could explain this increase in velocity  
 384 is changes to the stability and strength of the sea-ice in Porpoise Bay reducing glacier  
 385 buttressing. Alternatively, dynamic changes associated with incursions of warm subsurface  
 386 ocean water and associated thinning could have driven the increase in velocity e.g. Pine Island  
 387 Glacier (Rignot, 2008; Jacobs et al., 2011). However, with sea-ice concentration data only  
 388 available after 1972, and with only limited atmospheric data, and no oceanic or sea-ice  
 389 thickness data, it is impossible to be more conclusive.

## 390 6. Conclusion

391 Glacier terminus position changes are analysed at approximately monthly intervals between  
 392 November 2002 and March 2012 for six glaciers in Porpoise Bay, Wilkes Land, East  
 393 Antarctica. We identify a large simultaneous calving event in January 2007 which was driven  
 394 by the break-up of the multi-year landfast sea-ice which usually occupies the bay. This  
 395 provides a previously unreported mechanism for the rapid disintegration of floating glacier  
 396 tongues in East Antarctica. Throughout the observational period, major calving activity only  
 397 takes place following the near-complete removal of sea-ice from glacier termini. This is an  
 398 important discovery because sea-ice and land-fast sea-ice are widely considered to be highly  
 399 sensitive to changes in climate (Heil, 2006; Mahoney et al., 2007). Therefore, if the sea-ice  
 400 which usually occupies Porpoise Bay became weaker or less permanent in a warmer climate,  
 401 there could be an associated dynamic response of glaciers following the decrease in  
 402 buttressing.

403 Reconstructions of the calving cycle of Holmes (West) Glacier show that its present day  
 404 velocities are approximately 50% faster than between 1963 and 1973, making it the only  
 405 glacier in East Antarctica known to exhibit a recent increase in velocity. As the interaction  
 406 between sea-ice and floating glacier tongues is currently poorly represented in models, we  
 407 suggest that this may provide another mechanism capable of explaining some of the rapid mass  
 408 loss which may have happened in the past, and may be an important process in the context of  
 409 future warming. We conclude by highlighting the importance of regular monitoring of glaciers  
 410 in Porpoise Bay following the 2016 calving event, and in particular, the re-formation of the  
 411 landfast ice following its break-up.

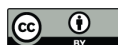

412

413 **Acknowledgements:** We thank the ESA for providing Envisat ASAR WSM data (Project ID:  
 414 16713) and Sentinel data. Landsat imagery was provided free of charge by the U.S. Geological  
 415 Survey Earth Resources Observation Science Centre. We thank M. van den Broeke for  
 416 providing data and assisting with RACMO2.3. B.W.J.M was funded by a Durham University  
 417 Doctoral Scholarship program. S.S.R.J. was supported by Natural Environment Research  
 418 Council Fellowship NE/J018333/1.

## 419 References

- 420 Aitken, A. R. A., Roberts, J. L., van Ommen, T. D., Young, D. A., Golledge, N. R.,  
 421 Greenbaum, J. S., Blankenship, D. D., and Siegert, M. J.: Repeated large-scale retreat and  
 422 advance of Totten Glacier indicated by inland bed erosion, *Nature*, 533, 385–+,  
 423 10.1038/nature17447, 2016.
- 424 Amundson, J. M., Fahnestock, M., Truffer, M., Brown, J., Luthi, M. P., and Motyka, R. J.: Ice  
 425 melange dynamics and implications for terminus stability, Jakobshavn Isbrae Greenland, *J*  
 426 *Geophys Res-Earth*, 115, Artn F01005 Doi 10.1029/2009jf001405, 2010.
- 427 Arntsen, A. E., Song, A. J., Perovich, D. K., and Richter-Menge, J. A.: Observations of the  
 428 summer breakup of an Arctic sea ice cover, *Geophys Res Lett*, 42, 8057-8063,  
 429 10.1002/2015GL065224, 2015.
- 430 Astrom, J. A., Vallot, D., Schafer, M., Welty, E. Z., O'Neel, S., Bartholomaeus, T. C., Liu, Y.,  
 431 Riikila, T. I., Zwinger, T., Timonen, J., and Moore, J. C.: Termini of calving glaciers as self-  
 432 organized critical systems, *Nat Geosci*, 7, 874-878, 10.1038/NGEO2290, 2014.
- 433 Banwell, A. F., MacAyeal, D. R., and Sergienko, O. V.: Breakup of the Larsen B Ice Shelf  
 434 triggered by chain reaction drainage of supraglacial lakes, *Geophys Res Lett*, 40, 5872-5876,  
 435 10.1002/2013GL057694, 2013.
- 436 Bassis, J. N., and Jacobs, S.: Diverse calving patterns linked to glacier geometry, *Nat Geosci*,  
 437 6, 833-836, 10.1038/NGEO1887, 2013.
- 438 Benn, D. I., Warren, C. R., and Mottram, R. H.: Calving processes and the dynamics of calving  
 439 glaciers, *Earth-Sci Rev*, 82, 143-179, 10.1016/j.earscirev.2007.02.002, 2007.
- 440 Carr, J. R., Vieli, A., and Stokes, C.: Influence of sea ice decline, atmospheric warming, and  
 441 glacier width on marine-terminating outlet glacier behavior in northwest Greenland at seasonal  
 442 to interannual timescales, *J Geophys Res-Earth*, 118, 1210-1226, Doi 10.1002/Jgrf.20088,  
 443 2013.
- 444 Carr, J. R., Vieli, A., Stokes, C. R., Jamieson, S. S. R., Palmer, S. J., Christoffersen, P.,  
 445 Dowdeswell, J. A., Nick, F. M., Blankenship, D. D., and Young, D. A.: Basal topographic  
 446 controls on rapid retreat of Humboldt Glacier, northern Greenland, *J Glaciol*, 61, 137-150,  
 447 10.3189/2015JoG14J128, 2015.

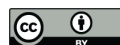

- 448 Cassotto, R., Fahnestock, M., Amundson, J. M., Truffer, M., and Joughin, I.: Seasonal and  
449 interannual variations in ice melange and its impact on terminus stability, Jakobshavn Isbrae,  
450 Greenland, *J Glaciol*, 61, 76-88, 10.3189/2015JoG13J235, 2015.
- 451 Chapuis, A., and Tetzlaff, T.: The variability of tidewater-glacier calving: origin of event-size  
452 and interval distributions, *J Glaciol*, 60, 622-634, 10.3189/2014JoG13J215, 2014.
- 453 Comiso, J. C.: Bootstrap Sea Ice Concentrations from Nimbus-7 SMMR and DMSP SSM/I-  
454 SSMIS. Version 2, Boulder, Colorado USA: NASA National Snow and Ice Data Center  
455 Distributed Active Archive Center., 2014.
- 456 Cook, A. J., Fox, A. J., Vaughan, D. G., and Ferrigno, J. G.: Retreating Glacier Fronts on the  
457 Antarctic Peninsula over the Past Half-Century, *Science*, 308, 541-544,  
458 10.1126/science.1104235, 2005.
- 459 Cook, C. P., Hill, D. J., van de Flierdt, T., Williams, T., Hemming, S. R., Dolan, A. M., Pierce,  
460 E. L., Escutia, C., Harwood, D., Cortese, G., and Gonzales, J. J.: Sea surface temperature  
461 control on the distribution of far-traveled Southern Ocean ice-rafted detritus during the  
462 Pliocene, *Paleoceanography*, 29, 533-548, Doi 10.1002/2014pa002625, 2014.
- 463 De Angelis, H., and Skvarca, P.: Glacier surge after ice shelf collapse, *Science*, 299, 1560-  
464 1562, DOI 10.1126/science.1077987, 2003.
- 465 DeConto, R. M., and Pollard, D.: Contribution of Antarctica to past and future sea-level rise,  
466 *Nature*, 531, 591-+, 10.1038/nature17145, 2016.
- 467 Depoorter, M. A., Bamber, J. L., Griggs, J. A., Lenaerts, J. T. M., Ligtenberg, S. R. M., van  
468 den Broeke, M. R., and Moholdt, G.: Calving fluxes and basal melt rates of Antarctic ice  
469 shelves, *Nature*, 502, 89-+, Doi 10.1038/Nature12567, 2013.
- 470 Ehn, J. K., Mundy, C. J., Barber, D. G., Hop, H., Rosnagel, A., and Stewart, J.: Impact of  
471 horizontal spreading on light propagation in melt pond covered seasonal sea ice in the  
472 Canadian Arctic, *J Geophys Res-Oceans*, 116, Artn C00g02 10.1029/2010jc006908, 2011.
- 473 Fraser, A. D., Massom, R. A., Michael, K. J., Galton-Fenzi, B. K., and Lieser, J. L.: East  
474 Antarctic Landfast Sea Ice Distribution and Variability, 2000-08, *J Climate*, 25, 1137-1156,  
475 10.1175/Jcli-D-10-05032.1, 2012.
- 476 Frezzotti, M., and Polizzi, M.: 50 years of ice-front changes between the Ade'lie and Banzare  
477 Coasts, East Antarctica, *Ann Glaciol*, 34, 235-240, 10.3189/172756402781817897, 2002.
- 478 Greenbaum, J. S., Blankenship, D. D., Young, D. A., Richter, T. G., Roberts, J. L., Aitken, A.  
479 R. A., Legresy, B., Schroeder, D. M., Warner, R. C., van Ommen, T. D., and Siegert, M. J.:  
480 Ocean access to a cavity beneath Totten Glacier in East Antarctica, *Nat Geosci*, 8, 294-298,  
481 10.1038/NGEO2388, 2015.
- 482 Heil, P.: Atmospheric conditions and fast ice at Davis, East Antarctica: A case study, *J*  
483 *Geophys Res-Oceans*, 111, Artn C05009 10.1029/2005jc002904, 2006.
- 484 Jacobs, S. S., Jenkins, A., Giulivi, C. F., and Dutrieux, P.: Stronger ocean circulation and  
485 increased melting under Pine Island Glacier ice shelf, *Nat Geosci*, 4, 519-523, Doi  
486 10.1038/Ngeo1188, 2011.



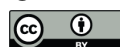

- 487 Kim, K., Jezek, K. C., and Liu, H.: Orthorectified image mosaic of Antarctica from 1963  
488 Argon satellite photography: image processing and glaciological applications, *Int J Remote*  
489 *Sens*, 28, 5357-5373, 2007.
- 490 King, M. A., Bingham, R. J., Moore, P., Whitehouse, P. L., Bentley, M. J., and Milne, G. A.:  
491 Lower satellite-gravimetry estimates of Antarctic sea-level contribution, *Nature*, 491, 586-+,  
492 Doi 10.1038/Nature11621, 2012.
- 493 Landy, J., Ehn, J., Shields, M., and Barber, D.: Surface and melt pond evolution on landfast  
494 first-year sea ice in the Canadian Arctic Archipelago, *J Geophys Res-Oceans*, 119, 3054-3075,  
495 10.1002/2013JC009617, 2014.
- 496 Lei, R. B., Li, Z. J., Cheng, B., Zhang, Z. H., and Heil, P.: Annual cycle of landfast sea ice in  
497 Prydz Bay, east Antarctica, *J Geophys Res-Oceans*, 115, Artn C02006 10.1029/2008jc005223,  
498 2010.
- 499 Liu, H. X., and Jezek, K. C.: A complete high-resolution coastline of Antarctica extracted from  
500 orthorectified Radarsat SAR imagery, *Photogramm Eng Rem S*, 70, 605-616, 2004.
- 501 Mahoney, A., Eicken, H., Gaylord, A. G., and Shapiro, L.: Alaska landfast sea ice: Links with  
502 bathymetry and atmospheric circulation, *J Geophys Res-Oceans*, 112, Artn C02001  
503 10.1029/2006jc003559, 2007.
- 504 Massom, R. A., Giles, A. B., Warner, R. C., Fricker, H. A., Legresy, B., Hyland, G.,  
505 Lescarmonier, L., and Young, N.: External influences on the Mertz Glacier Tongue (East  
506 Antarctica) in the decade leading up to its calving in 2010, *J Geophys Res-Earth*, 120, 490-506,  
507 10.1002/2014JF003223, 2015.
- 508 McFadden, E. M., Howat, I. M., Joughin, I., Smith, B., and Ahn, Y.: Changes in the dynamics  
509 of marine terminating outlet glaciers in west Greenland (2000-2009), *J Geophys Res-Earth*,  
510 116, Artn F02022 10.1029/2010jf001757, 2011.
- 511 McMillan, M., Shepherd, A., Sundal, A., Briggs, K., Muir, A., Ridout, A., Hogg, A., and  
512 Wingham, D.: Increased ice losses from Antarctica detected by CryoSat-2, *Geophys Res Lett*,  
513 41, 3899-3905, Doi 10.1002/2014gl060111, 2014.
- 514 Miles, B. W. J., Stokes, C. R., Vieli, A., and Cox, N. J.: Rapid, climate-driven changes in  
515 outlet glaciers on the Pacific coast of East Antarctica, *Nature*, 500, 563-+, Doi  
516 10.1038/Nature12382, 2013.
- 517 Miles, B. W. J., Stokes, C. R., and Jamieson, S. S. R.: Pan-ice-sheet glacier terminus change in  
518 East Antarctica reveals sensitivity of Wilkes Land to sea-ice changes, *Science Advances*, 2,  
519 10.1126/sciadv.1501350, 2016.
- 520 Moon, T., and Joughin, I.: Changes in ice front position on Greenland's outlet glaciers from  
521 1992 to 2007, *J Geophys Res-Earth*, 113, Artn F02022 Doi 10.1029/2007jf000927, 2008.
- 522 Parkinson, C. L., J. C. Comiso, and H. J. Zwally. 1999, updated 2004. *Nimbus-5 ESMR Polar*  
523 *Gridded Sea Ice Concentrations*. Edited by W. Meier and J. Stroeve. Boulder, Colorado USA:  
524 National Snow and Ice Data Center. Digital media.

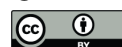

- 525 Petrich, C., Eicken, H., Polashenski, C. M., Sturm, M., Harbeck, J. P., Perovich, D. K., and  
526 Finnegan, D. C.: Snow dunes: A controlling factor of melt pond distribution on Arctic sea ice,  
527 J Geophys Res-Oceans, 117, Artn C0902910.1029/2012jc008192, 2012.
- 528 Pritchard, H. D., Arthern, R. J., Vaughan, D. G., and Edwards, L. A.: Extensive dynamic  
529 thinning on the margins of the Greenland and Antarctic ice sheets, Nature, 461, 971-975,  
530 10.1038/nature08471, 2009.
- 531 Rignot, E., Casassa, G., Gogineni, P., Krabill, W., Rivera, A., and Thomas, R.: Accelerated ice  
532 discharge from the Antarctic Peninsula following the collapse of Larsen B ice shelf, Geophys  
533 Res Lett, 31, Artn L1840110.1029/2004gl020697, 2004.
- 534 Rignot, E.: Changes in West Antarctic ice stream dynamics observed with ALOS PALSAR  
535 data, Geophys Res Lett, 35, Artn L1250510.1029/2008gl033365, 2008.
- 536 Rignot, E., Mouginot, J., and Scheuchl, B.: Antarctic grounding line mapping from differential  
537 satellite radar interferometry, Geophys Res Lett, 38, Artn L1050410.1029/2011gl047109,  
538 2011a.
- 539 Rignot, E., Mouginot, J., and Scheuchl, B.: Ice Flow of the Antarctic Ice Sheet, Science, 333,  
540 1427-1430, 10.1126/science.1208336, 2011b.
- 541 Rignot, E., Jacobs, S., Mouginot, J., and Scheuchl, B.: Ice-Shelf Melting Around Antarctica,  
542 Science, 341, 266-270, DOI 10.1126/science.1235798, 2013.
- 543 Rott, H., Skvarca, P., and Nagler, T.: Rapid collapse of northern Larsen Ice Shelf, Antarctica,  
544 Science, 271, 788-792, DOI 10.1126/science.271.5250.788, 1996.
- 545 Sasgen, I., Konrad, H., Ivins, E. R., Van den Broeke, M. R., Bamber, J. L., Martinec, Z., and  
546 Klemann, V.: Antarctic ice-mass balance 2003 to 2012: regional reanalysis of GRACE satellite  
547 gravimetry measurements with improved estimate of glacial-isostatic adjustment based on GPS  
548 uplift rates, Cryosphere, 7, 1499-1512, DOI 10.5194/tc-7-1499-2013, 2013.
- 549 Scambos, T., Hulbe, C., and Fahnestock, M.: Climate-induced ice shelf disintegration in the  
550 Antarctic Peninsula, Antarct Res Ser, 79, 79-92, 2003.
- 551 Scambos, T., Fricker, H. A., Liu, C. C., Bohlander, J., Fastook, J., Sargent, A., Massom, R.,  
552 and Wu, A. M.: Ice shelf disintegration by plate bending and hydro-fracture: Satellite  
553 observations and model results of the 2008 Wilkins ice shelf break-ups, Earth Planet Sc Lett,  
554 280, 51-60, 10.1016/j.epsl.2008.12.027, 2009.
- 555 Schroder, D., Feltham, D. L., Flocco, D., and Tsamados, M.: September Arctic sea-ice  
556 minimum predicted by spring melt-pond fraction, Nat Clim Change, 4, 353-357,  
557 10.1038/Nclimate2203, 2014.
- 558 Spreen, G., Kaleschke, L., and Heygster, G.: Sea ice remote sensing using AMSR-E 89-GHz  
559 channels, J Geophys Res-Oceans, 113, Artn C02s0310.1029/2005jc003384, 2008.
- 560 Sugimoto, F., Tamura, T., Shimoda, H., Uto, S., Simizu, D., Tateyama, K., Hoshino, S., Ozeki,  
561 T., Fukamachi, Y., Ushio, S., and Ohshima, K. I.: Interannual variability in sea-ice thickness in  
562 the pack-ice zone off Lutzow-Holm Bay, East Antarctica, Polar Sci, 10, 43-51,  
563 10.1016/j.polar.2015.10.003, 2016.

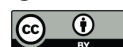

564 Todd, J., and Christoffersen, P.: Are seasonal calving dynamics forced by buttressing from ice  
565 melange or undercutting by melting? Outcomes from full-Stokes simulations of Store Glacier,  
566 West Greenland, *Cryosphere*, 8, 2353-2365, 10.5194/tc-8-2353-2014, 2014.

567 van der Veen, C. J.: Calving glaciers, *Prog Phys Geog*, 26, 96-122,  
568 10.1191/0309133302pp327ra, 2002.

569 van Wessem, J. M., Reijmer, C. H., Morlighem, M., Mouginot, J., Rignot, E., Medley, B.,  
570 Joughin, I., Wouters, B., Depoorter, M. A., Bamber, J. L., Lenaerts, J. T. M., van de Berg, W.  
571 J., van den Broeke, M. R., and van Meijgaard, E.: Improved representation of East Antarctic  
572 surface mass balance in a regional atmospheric climate model, *J Glaciol*, 60, 761-770,  
573 10.3189/2014JoG14J051, 2014.

574 Wang, X., Holland, D. M., Cheng, X., and Gong, P.: Grounding and Calving Cycle of Mertz  
575 Ice Tongue Revealed by Shallow Mertz Bank, *The Cryosphere Discuss.*, 2016, 1-37,  
576 10.5194/tc-2016-3, 2016.

577 Wuite, J., Rott, H., Hetzenecker, M., Floricioiu, D., De Rydt, J., Gudmundsson, G. H., Nagler,  
578 T., and Kern, M.: Evolution of surface velocities and ice discharge of Larsen B outlet glaciers  
579 from 1995 to 2013, *Cryosphere*, 9, 957-969, 10.5194/tc-9-957-2015, 2015.

580 Yang, Y., Li, Z. J., Leppazranta, M., Cheng, B., Shi, L. Q., and Lei, R. B.: Modelling the  
581 thickness of landfast sea ice in Prydz Bay, East Antarctica, *Antarct Sci*, 28, 59-70,  
582 10.1017/S0954102015000449, 2016.

583 Young, D. A., Wright, A. P., Roberts, J. L., Warner, R. C., Young, N. W., Greenbaum, J. S.,  
584 Schroeder, D. M., Holt, J. W., Sugden, D. E., Blankenship, D. D., van Ommen, T. D., and  
585 Siegert, M. J.: A dynamic early East Antarctic Ice Sheet suggested by ice-covered fjord  
586 landscapes, *Nature*, 474, 72-75, 10.1038/nature10114, 2011.

587

588

589

590

591

592

593

594

595

596

597



598 **Table 1:** Glacier velocities from Rignot et al. (2011b)

| Glacier       | Velocity (m yr <sup>-1</sup> ) |
|---------------|--------------------------------|
| Sandford      | 440                            |
| Frost         | 2000                           |
| Glacier 1     | 950                            |
| Glacier 2     | 500                            |
| Holmes (East) | 600                            |
| Holmes (West) | 1450                           |

599

600 **Table 2:** Satellite imagery used in the study

| Satellite        | Date of Imagery                                    | Spatial resolution (m) |
|------------------|----------------------------------------------------|------------------------|
| ARGON            | October 1963 (Kim et al., 2007)                    | 140                    |
| Envisat ASAR WSM | August 2002, November 2002 to March 2012 (monthly) | 80                     |
| Landsat (MSS)    | January 1973                                       | 60                     |
| Landsat (TM)     | February 1991                                      | 30                     |
| MODIS            | March 2016                                         | 250                    |
| RADARSAT         | September 1997 (Liu and Jezek, 2004)               | 100                    |
| Sentinel-1       | February-May, 2016                                 | 40                     |

601

602

603

604

605

606

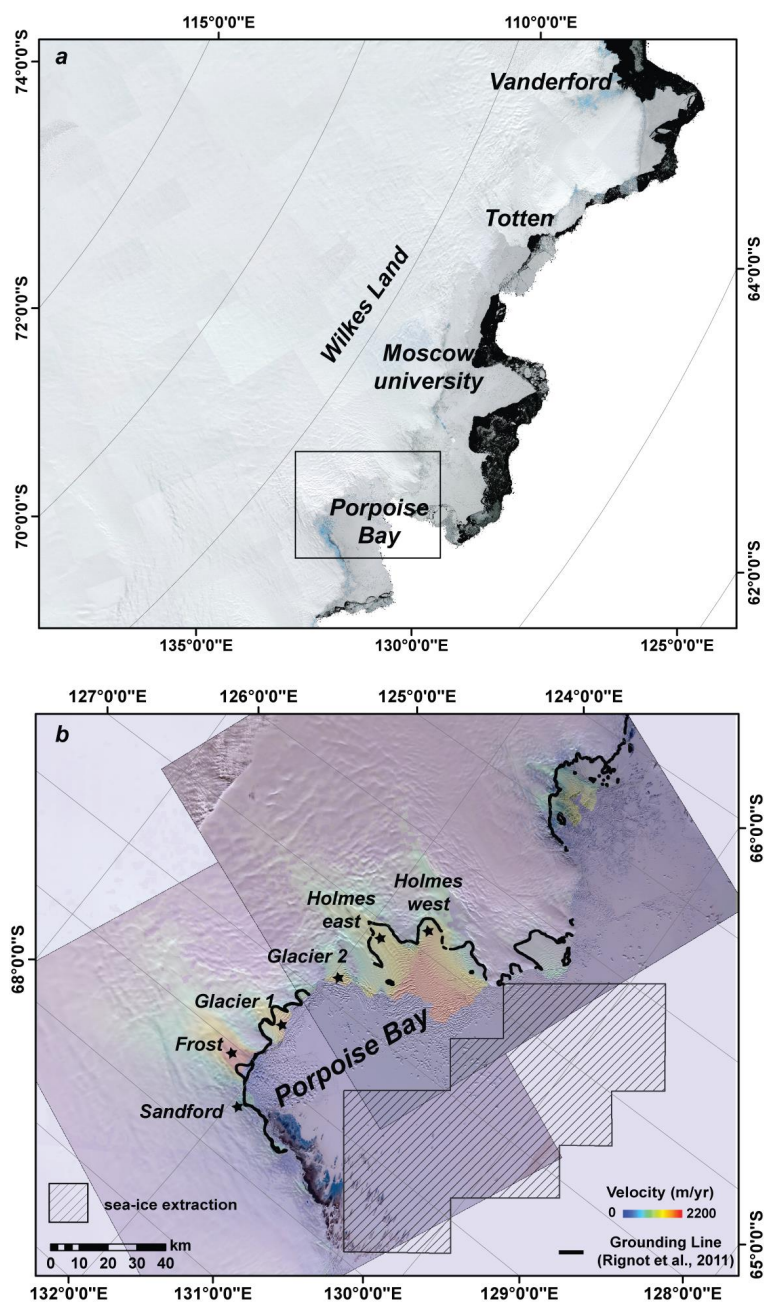

**Figure 1:** a) MODIS image of Wilkes Land, East Antarctica b) Landsat images of Porpoise Bay with glacier velocity (Rignot et al., 2011b) and grounding lines (Rignot et al., 2011a) overlain. The hatched polygon represents the region where sea-ice concentrations were extracted.

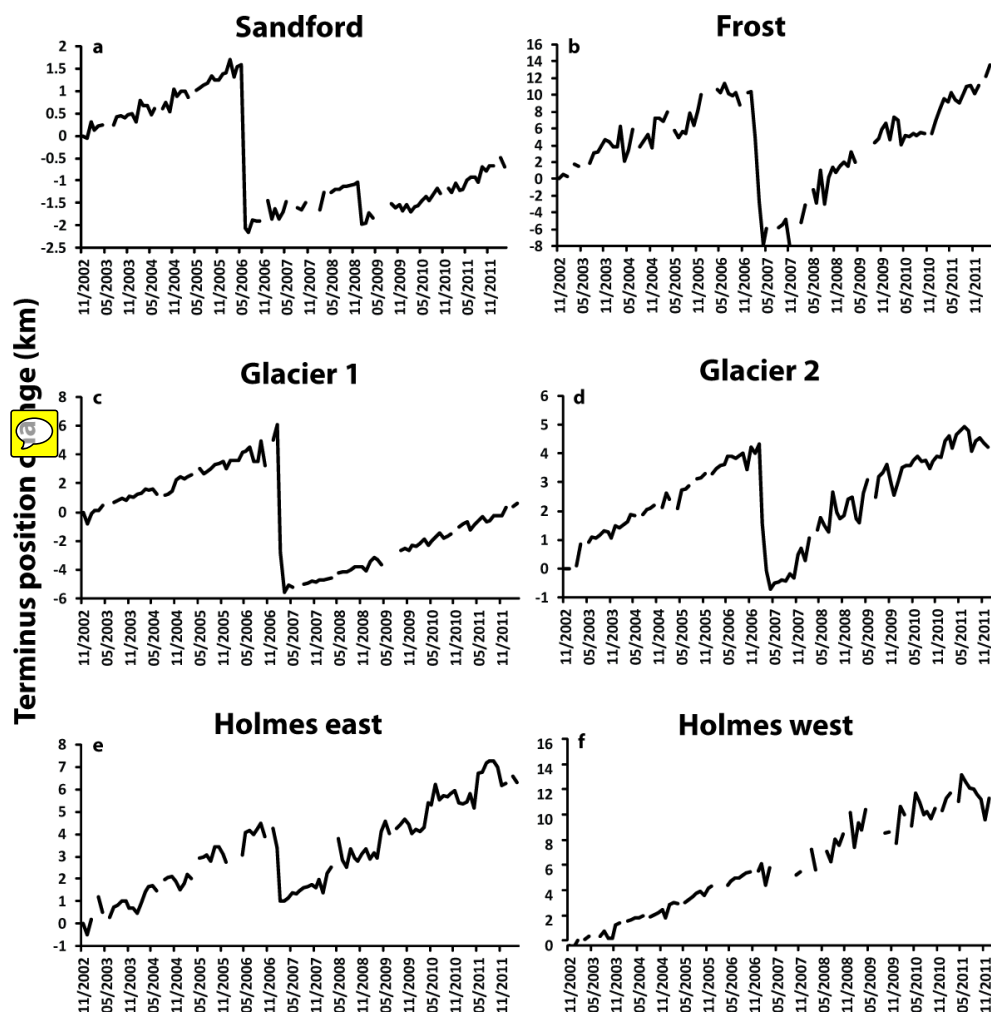

**Figure 2:** Terminus position change of six glaciers in porpoise Bay between November 2002 and March 2012. Note the major calving event in January 2007 for 5 of the glaciers. Terminus position measurements are subject to  $\pm 500$  m.



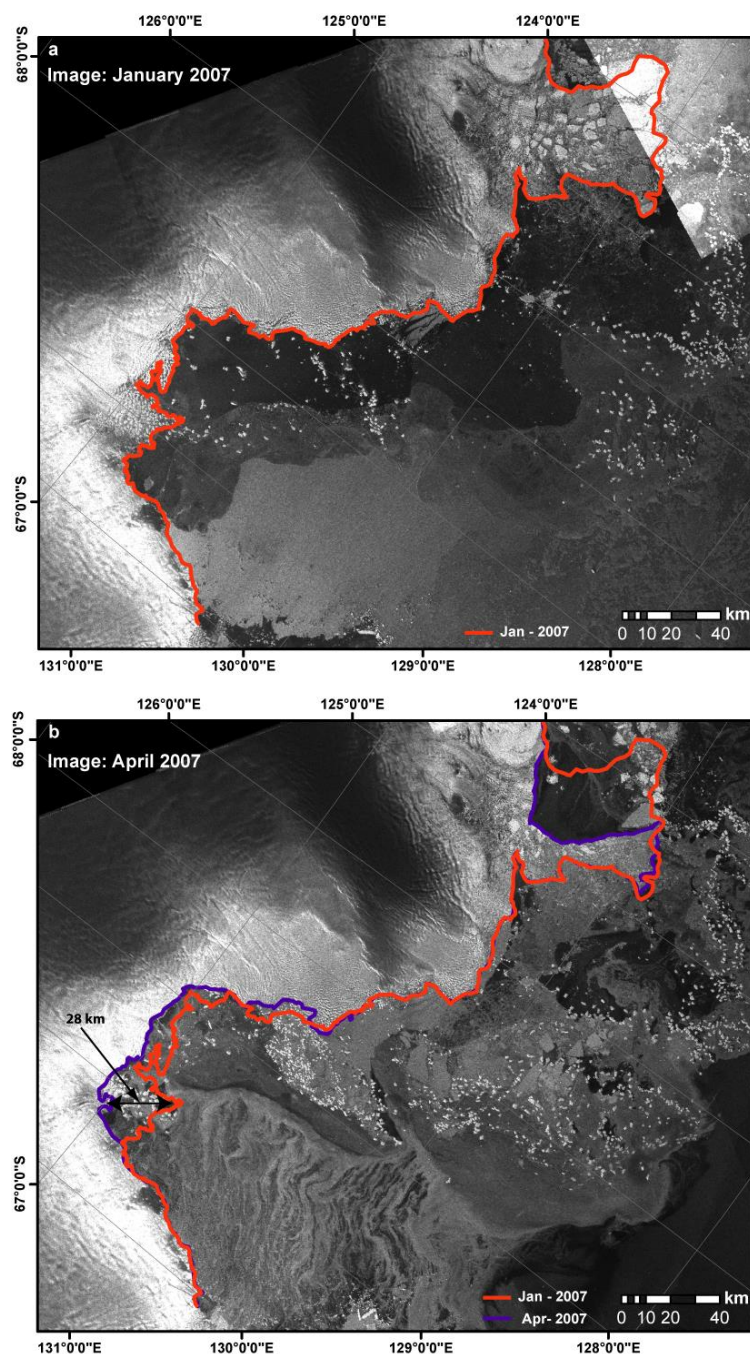

**Figure 3:** Envisat ASAR WSM imagery in January 2007 **a)** and April 2007 **b)**, which are immediately prior to and after a significant calving event in Porpoise Bay. Red line shows terminus positions in January 2007 and blue line shows the positions in April 2007.



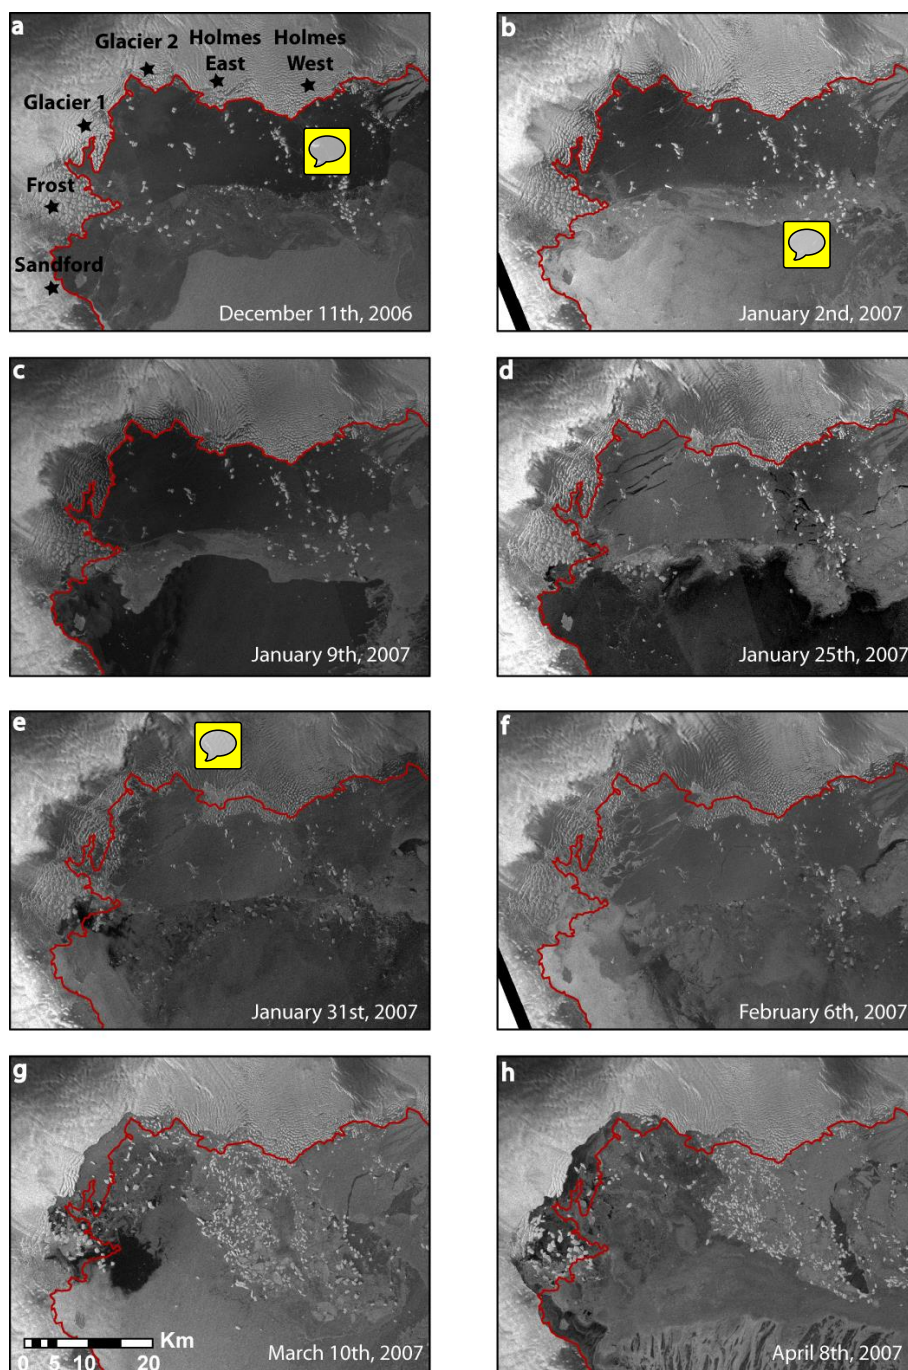

620

621 **Figure 4:** Envisat ASAR WSM imagery showing the evolution of the 2007 calving event.  
 622 Red line shows the terminus positions from December 11<sup>th</sup> 2006 on all panels.

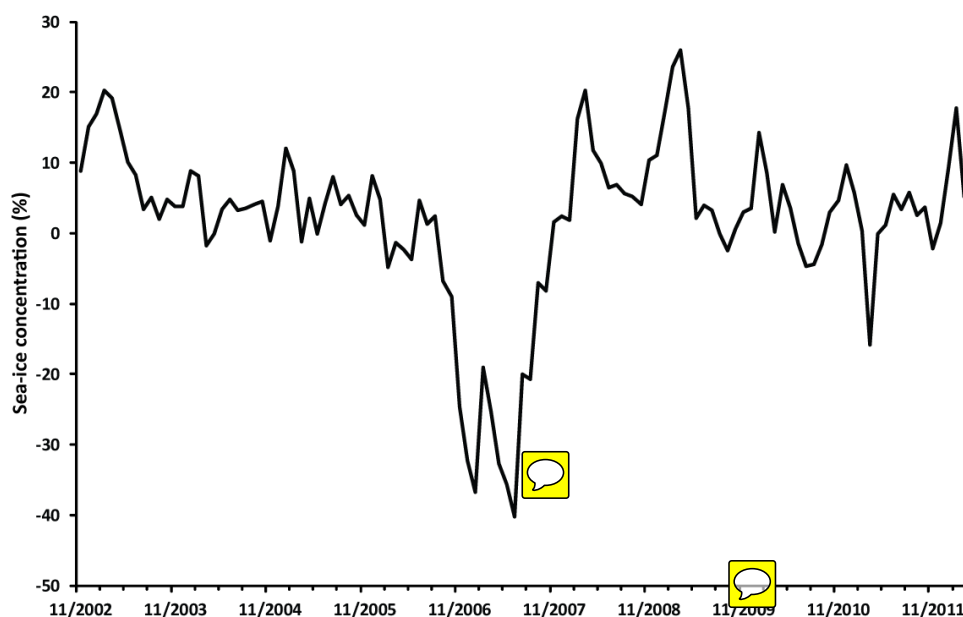

**Figure 5:** Mean monthly sea-ice concentration anomalies in Porpoise Bay.

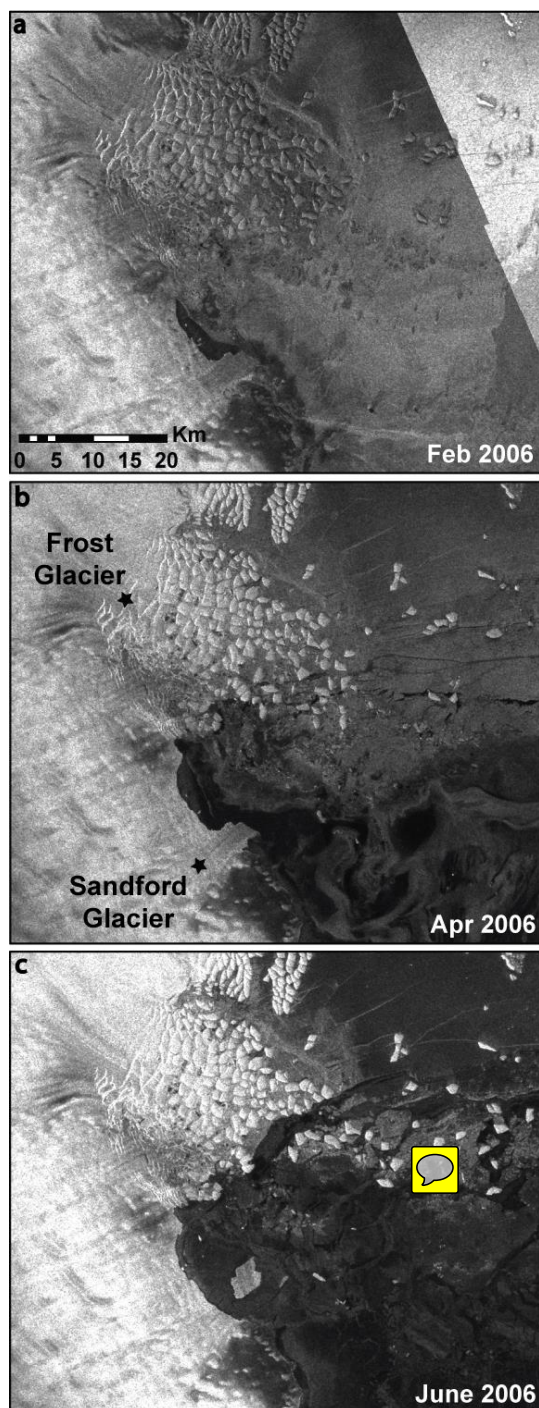

626

627 **Figure 6:** Time series of Frost and Sanford Glaciers calving showing that sea-ice clears prior  
 628 to calving and dispersal of icebergs.

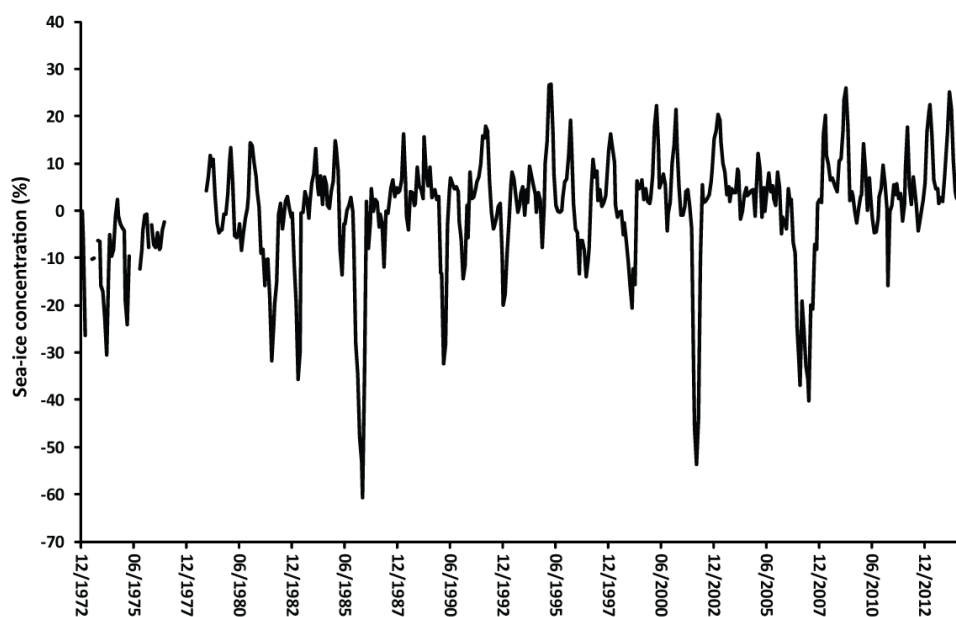

**Figure 7:** Mean monthly sea-ice concentration anomalies 1972-2014. Note major anomalies in April 1986, February 2002 and January 2007.



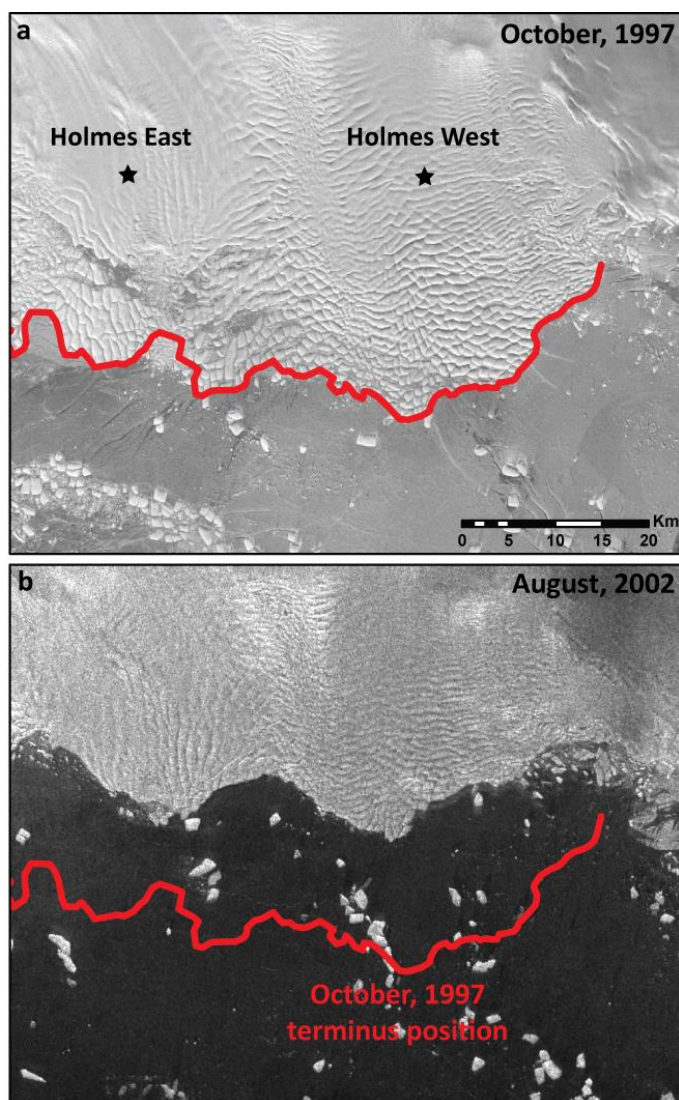

**Figure 8:** Comparison of terminus position between **a)** October 1997 (red line) and **b)** August 2002, which indicates major calving event(s) at some point between these two dates.

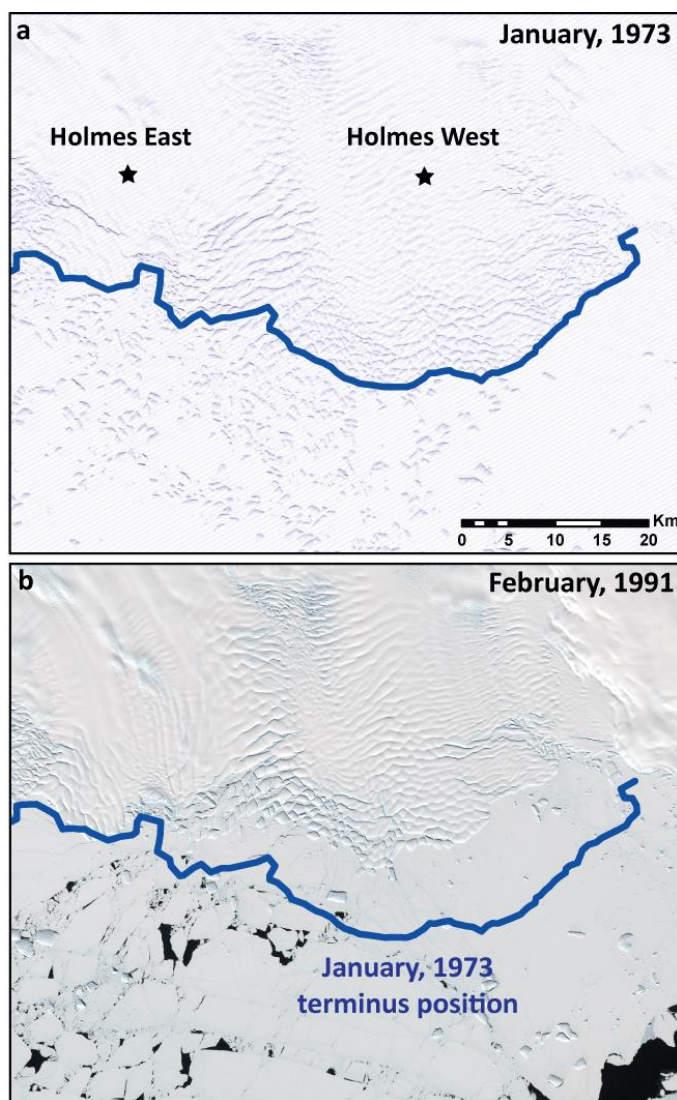

639

640 **Figure 9:** Comparison of terminus position change between January 1973 (blue line) and  
 641 February 1991, which indicates a calving event at some point between these two dates.

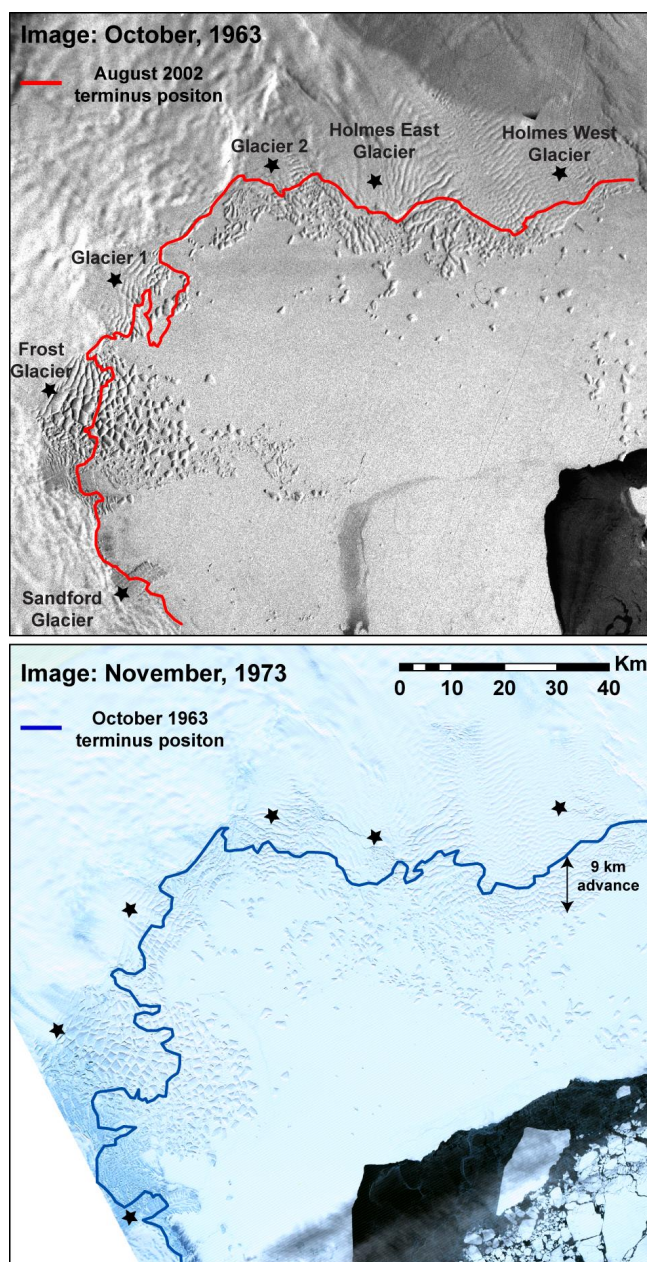

642

643 **Figure 10: a)** October 1963 terminus position. The red line shows the August 2002 terminus  
 644 position, which occurred a few months after a major calving event. Because Holmes (West)  
 645 glacier (and other glaciers) is in a similar position, it suggests that there has been a calving  
 646 event within a few years prior to this image i.e. late 1950s/early 1960s. **b)** November 1973  
 647 terminus position in relation to 1963 (blue). The relative position of glacier in Porpoise Bay in  
 648 1973 suggests that there were no calving events between these dates.





649

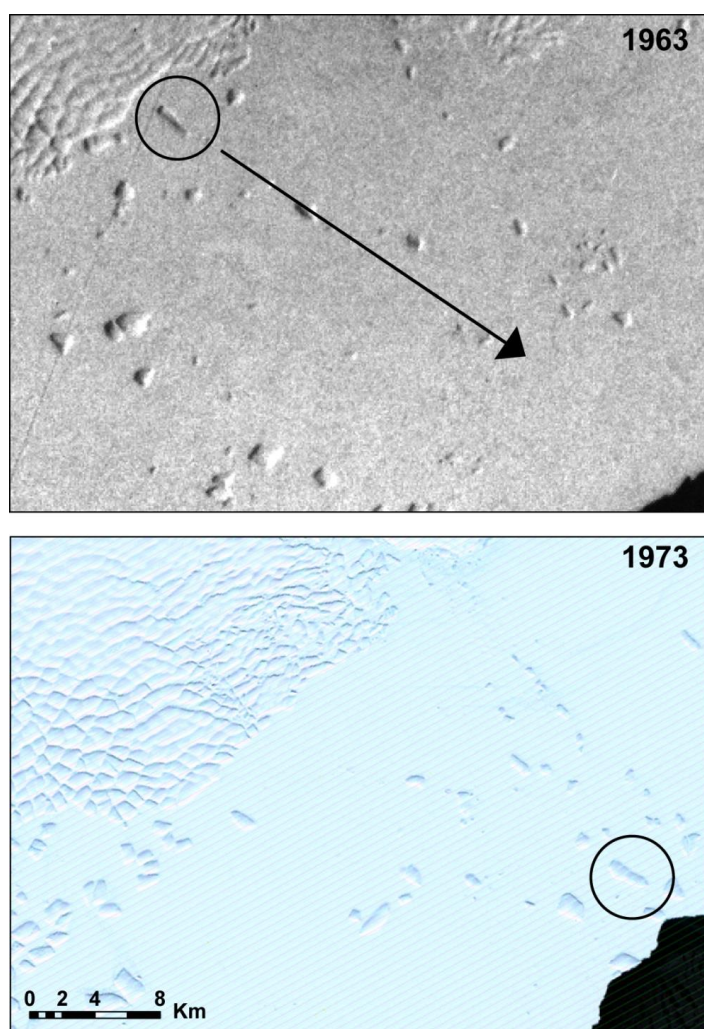

650

651 **Figure 11:** Iceberg tracking in front of Holmes (West) Glacier. The same iceberg can be seen  
 652 in both 1963 and 1973 suggesting there has not been a sea-ice break-up event during this  
 653 period (see also Figure 10 and the floating tongue on Sandford Glacier)

654

655

656

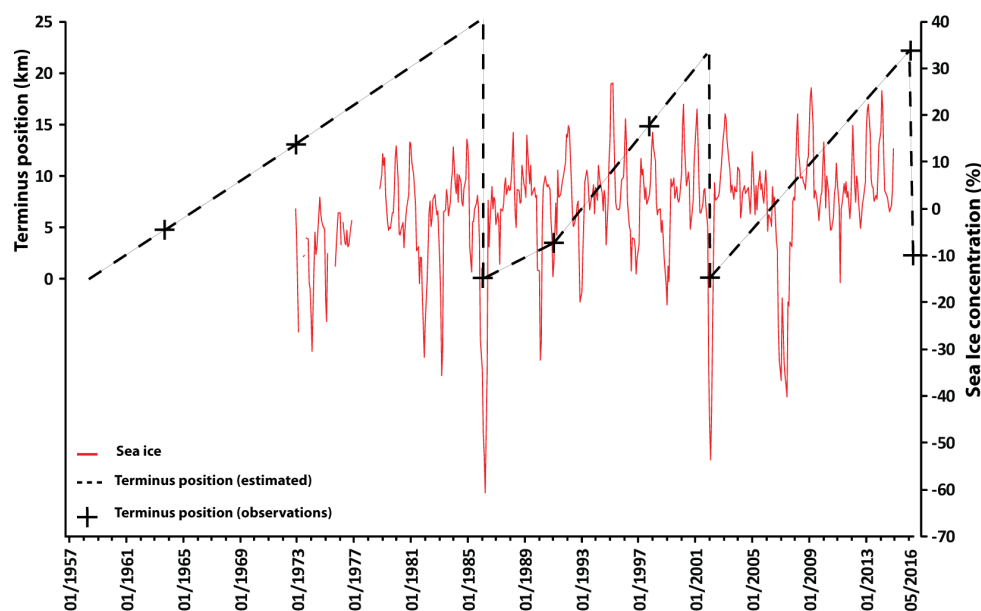

**Figure 12:** Reconstruction of the calving cycle of Holmes (West) Glacier. All observations are represented by black crosses. The estimated terminus position is then extrapolated linearly between each observation, with major calving inferred to coincide with major negative sea-ice concentration anomalies in 1986, 2002 and 2016. This suggests the previous three calving cycles to be ~29 years (~1957-1986), 16 years (1986-2002) and 14 years (2002-2016).

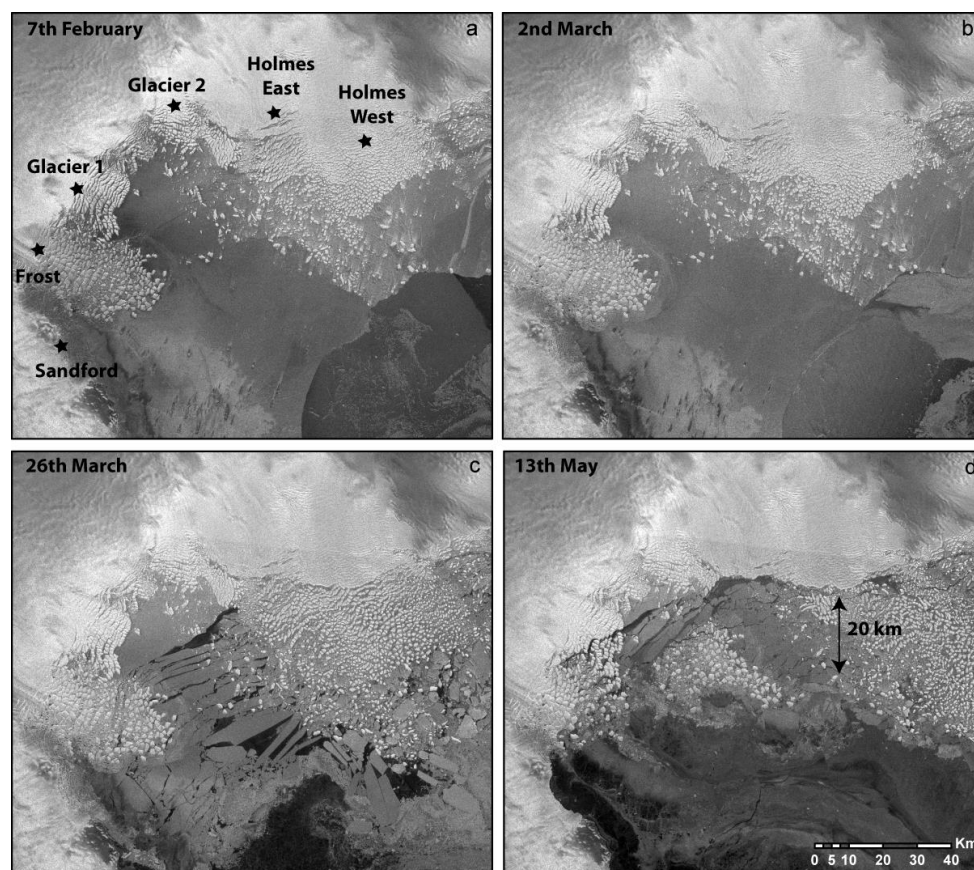

**Figure 13:** Time series of the (likely ongoing) evolution of the 2016 calving event in Porpoise Bay using Sentinel-1 satellite imagery. The disintegration event starts at some point between 2<sup>nd</sup> March and 26<sup>th</sup> March. By the 13th May Holmes (West) Glacier has retreated approximately 20 km and ~1,500 km<sup>2</sup> of ice had been lost from glacier tongues in Porpoise Bay.

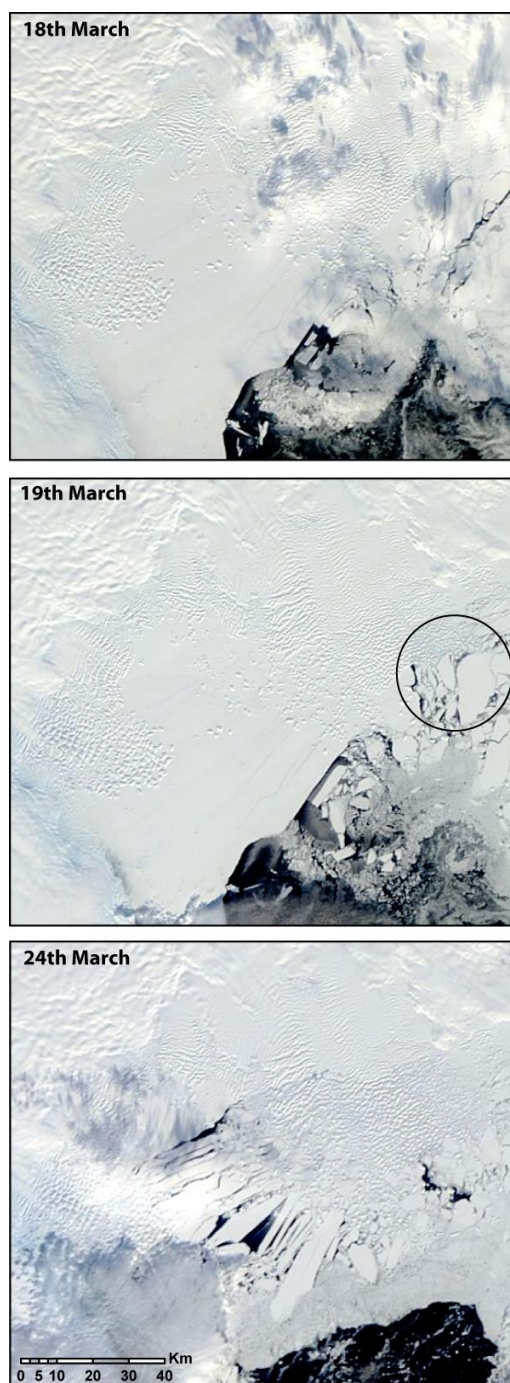

670

671 **Figure 14:** MODIS imagery showing the initial stages of disintegration of Holmes (West)  
 672 Glacier in March 2016. On March 19<sup>th</sup> a large section of sea-ice breaks away from the  
 673 terminus, initiating the rapid disintegration process.



674

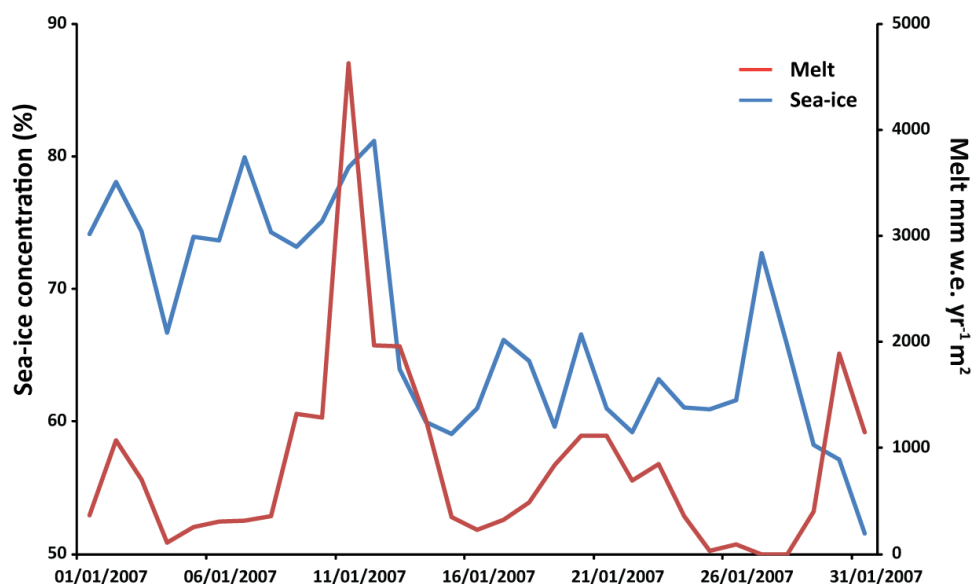

675

676 **Figure 15:** Daily sea-ice concentrations and RACMO2.3 derived melt during January 2007  
 677 in Porpoise Bay. Sea-ice concentrations start to decrease after the melt peak on January 11<sup>th</sup>.

678

679

680

681

682

683



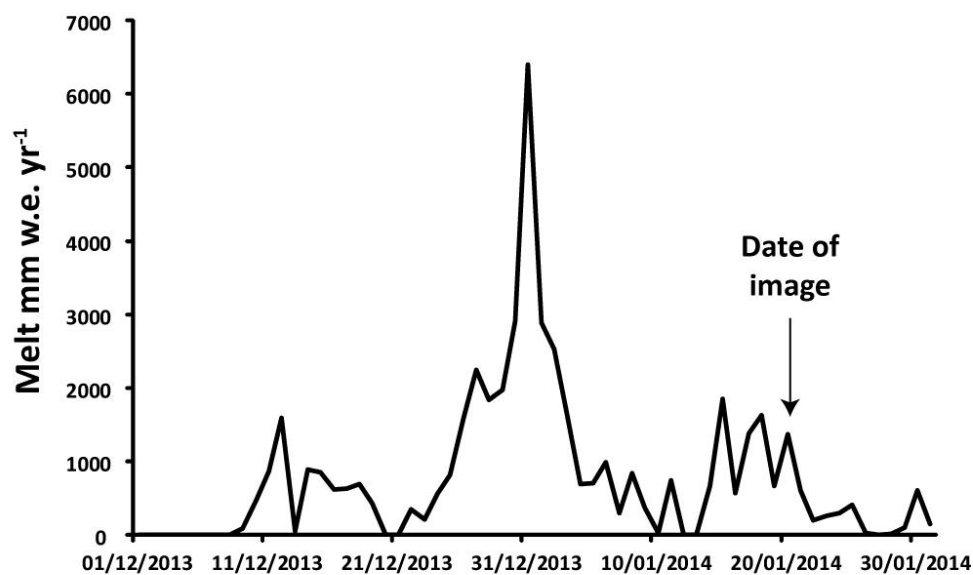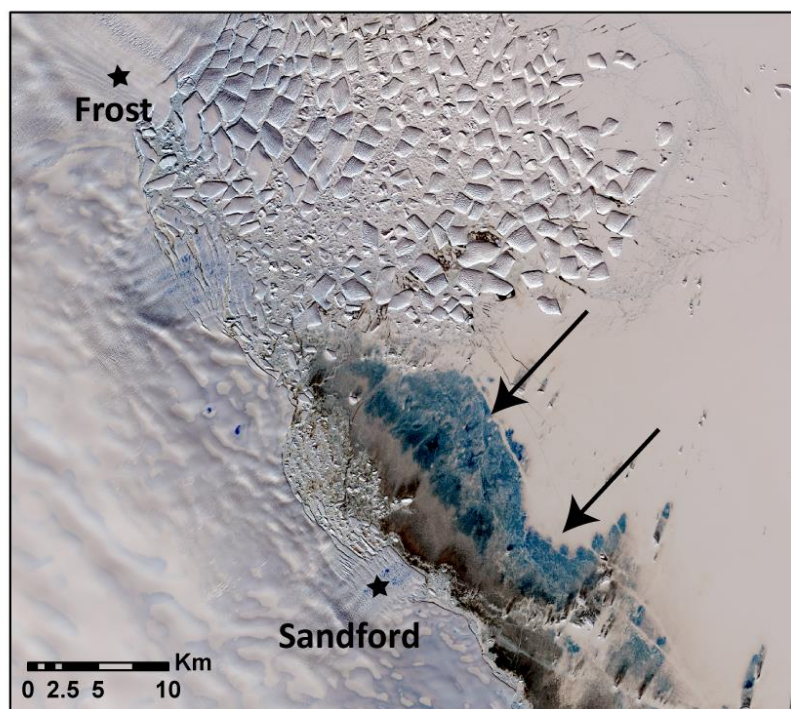

**Figure 16:** Evidence of substantial sea-ice surface ponding on the 21<sup>st</sup> January 2014 (arrows) following the exceptional melt event centred on the 31<sup>st</sup> December.

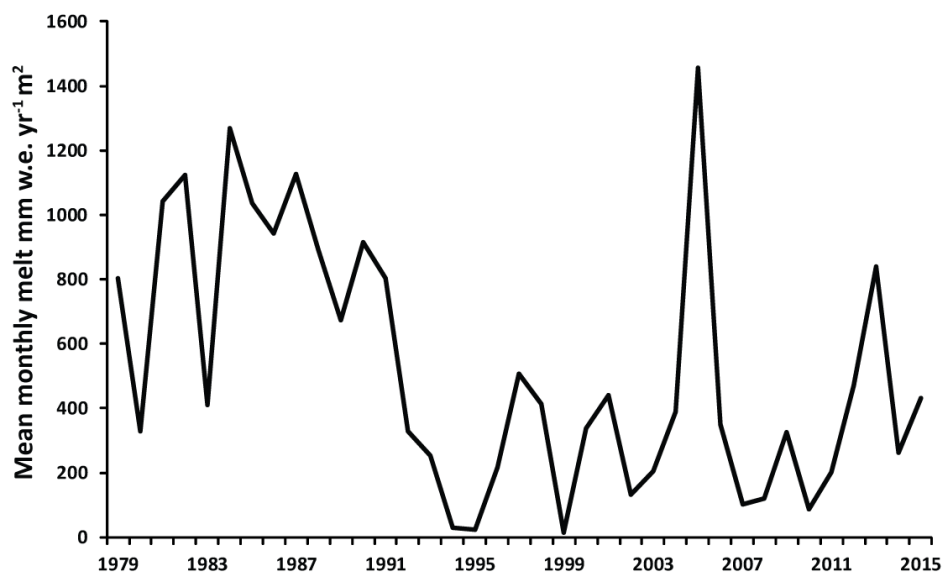

688

689 **Figure 17:** Mean RACMO2.3 December melt 1979-2015 in Porpoise Bay.



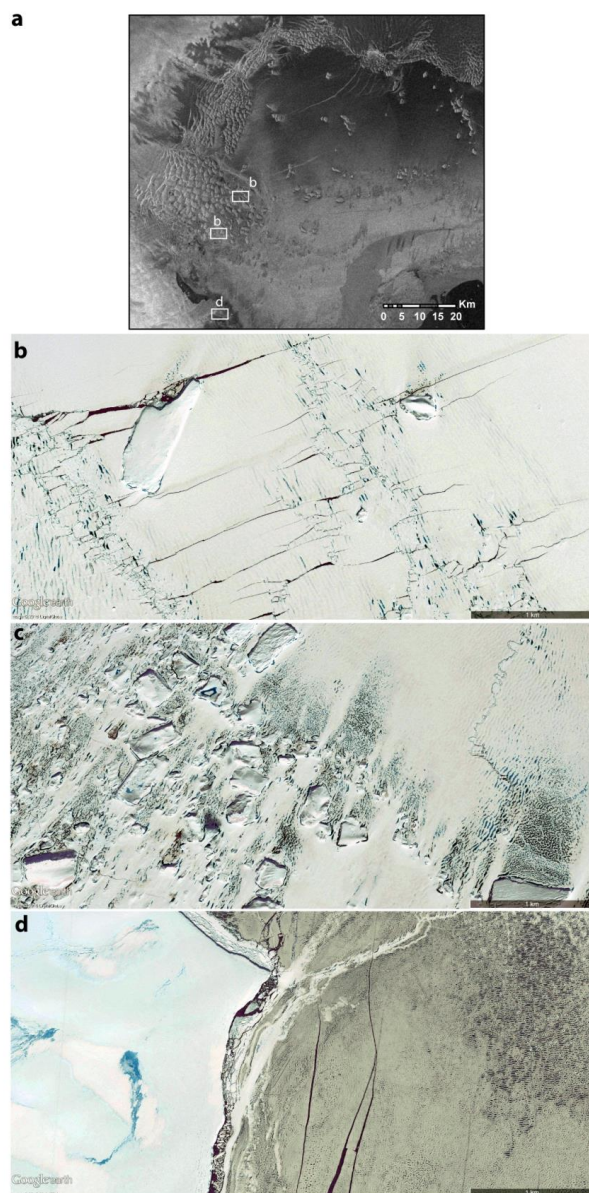

**Figure 18:** a) Envisat ASAR WSM image from January 2006. b, c, d) High resolution optical satellite imagery from 16/1/2006 showing sea-ice fracturing and surface melt ponds following the exceptionally high melt in December 2005, which were obtained from Google Earth.
